# Supplementary material for: Influence of Foliar Treatment with Suspensions Rich in Trichoderma Chlamydospores on Momordica charantia Physiology, Yield and Quality
Source: Preprints.org preprint supplement (doi:10.20944/preprints202312.0970.v1), 2023-12-13
Supplement: Supplementary file 3 [file supplementary]

**Supplementary materials**

**
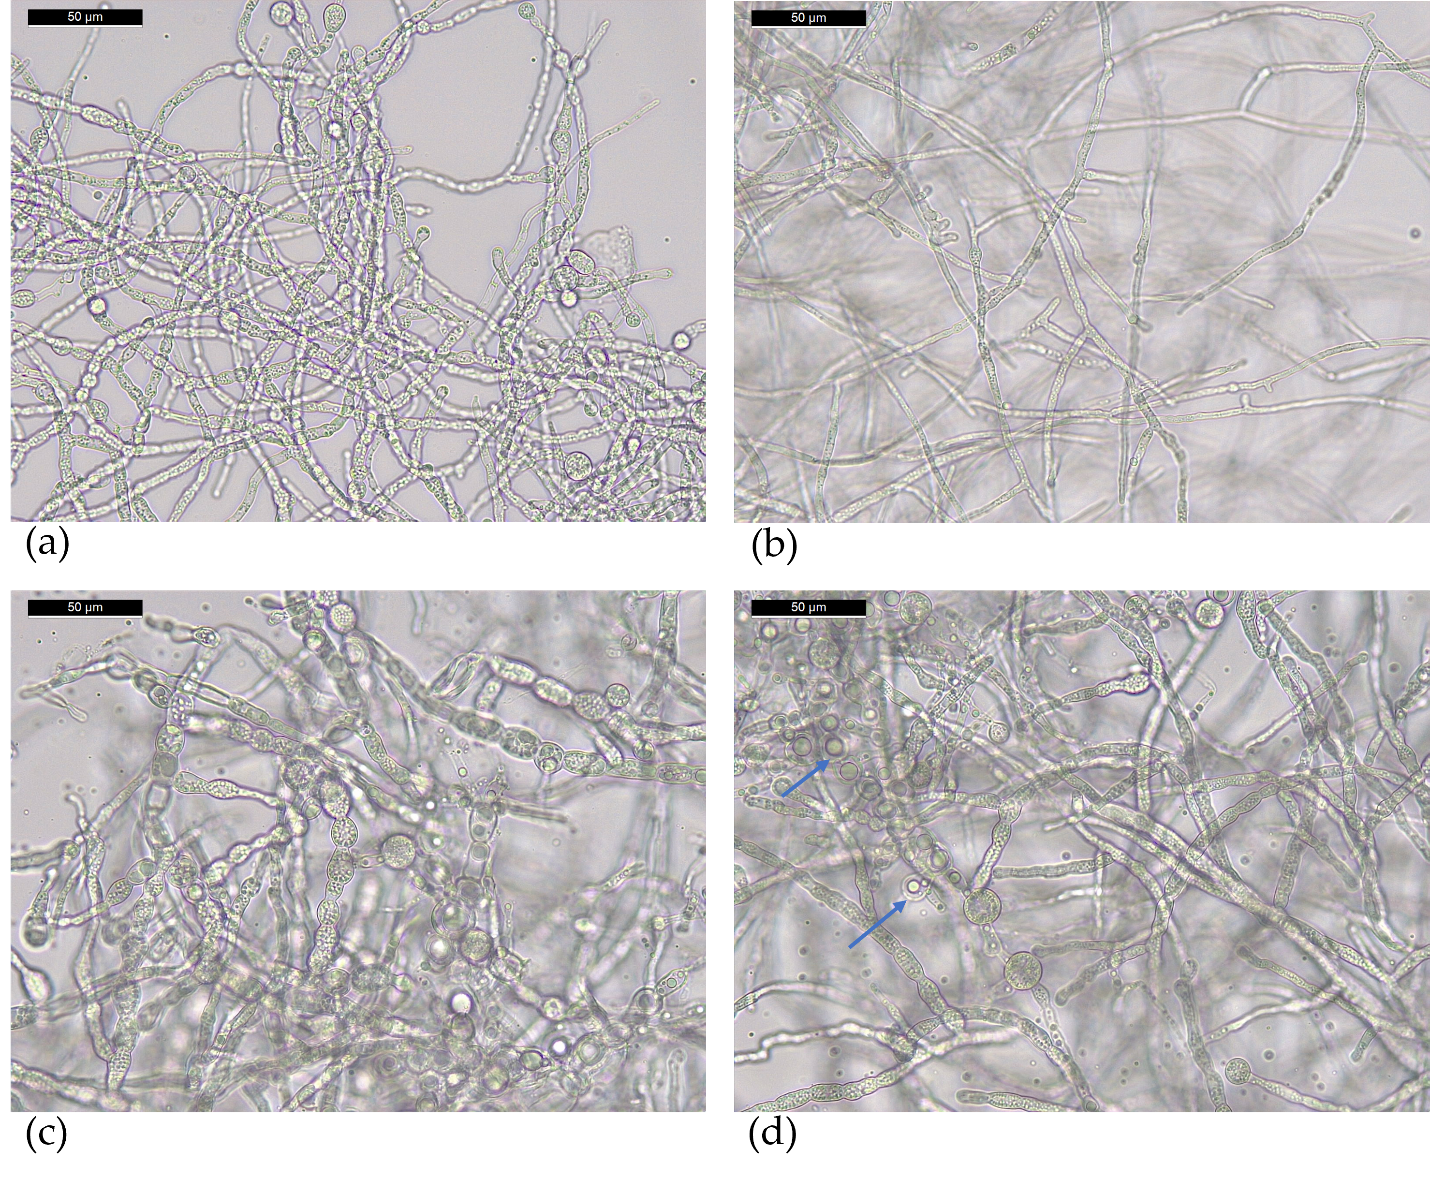
**

**Figure S1.** Optical microscopical images of *T. asperellum* T36 NCAIM F 001434 grown in PDB (a, b) and cornmeal medium (c, d). The blue arrows indicate the presence of vacuoles/droplets inside hyphae.


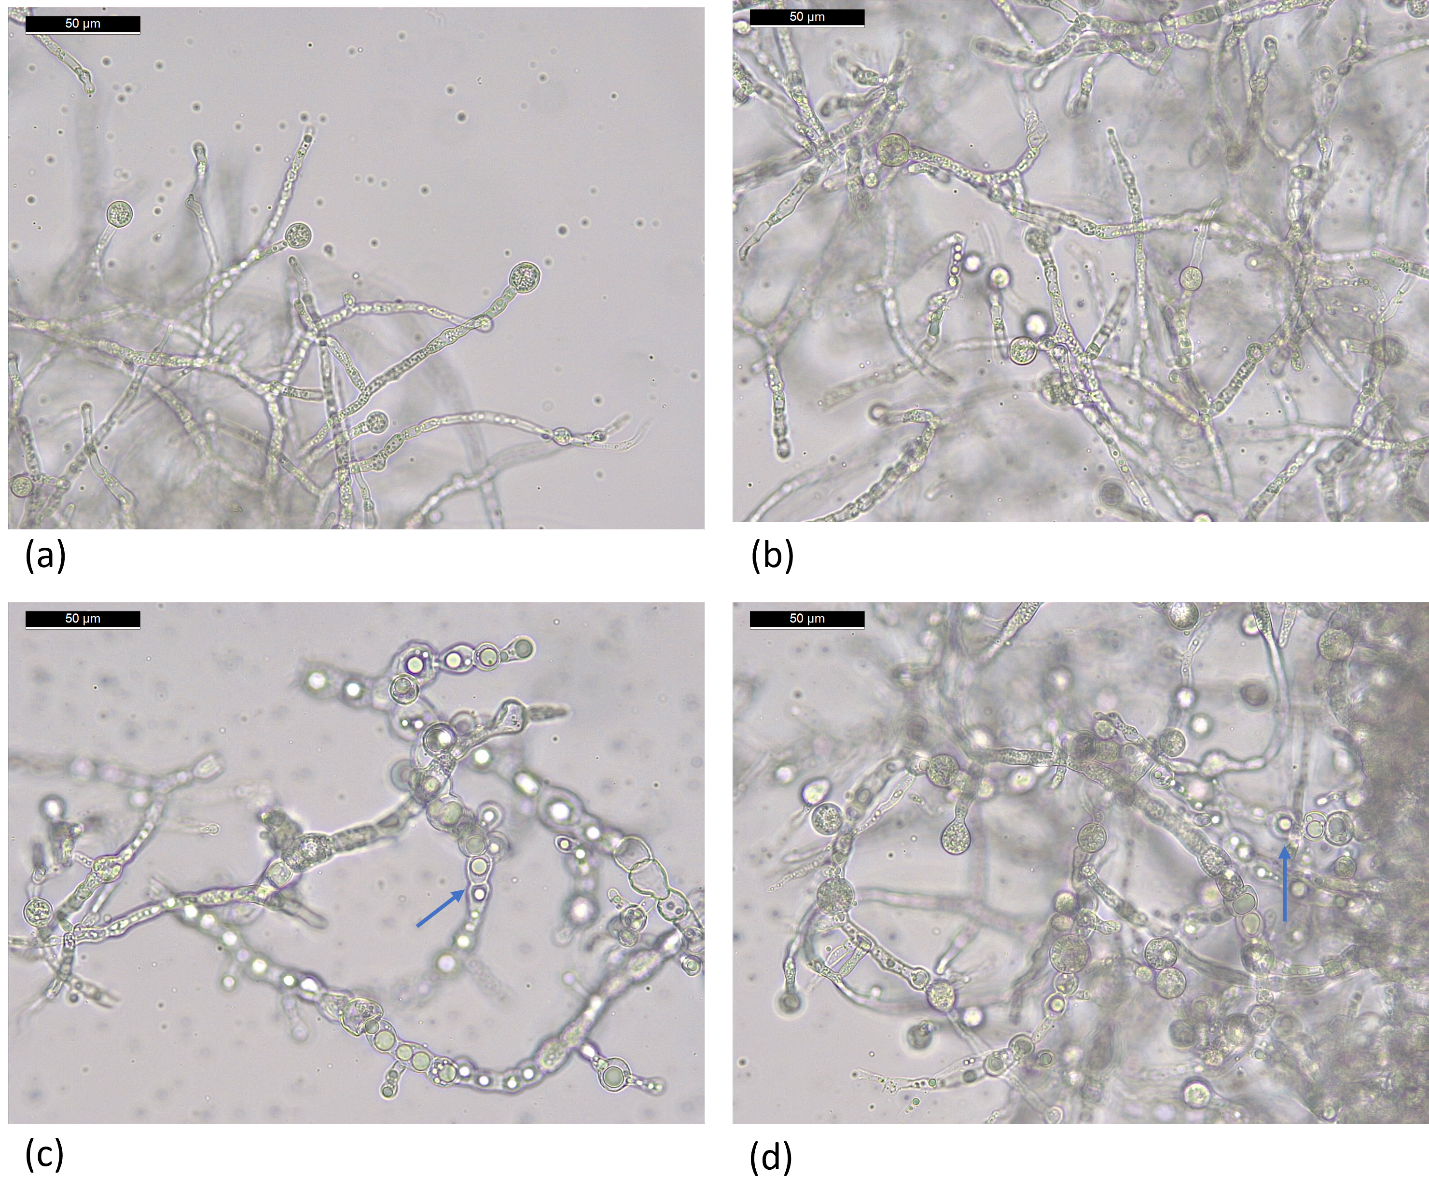


**Figure S2.** Optical microscopical images of *T. harzianum*, Td50b, NCAIM F001412 grown in PDB (a, b) and cornmeal medium (c, d). The blue arrows indicate the presence of vacuoles/droplets inside hyphae.


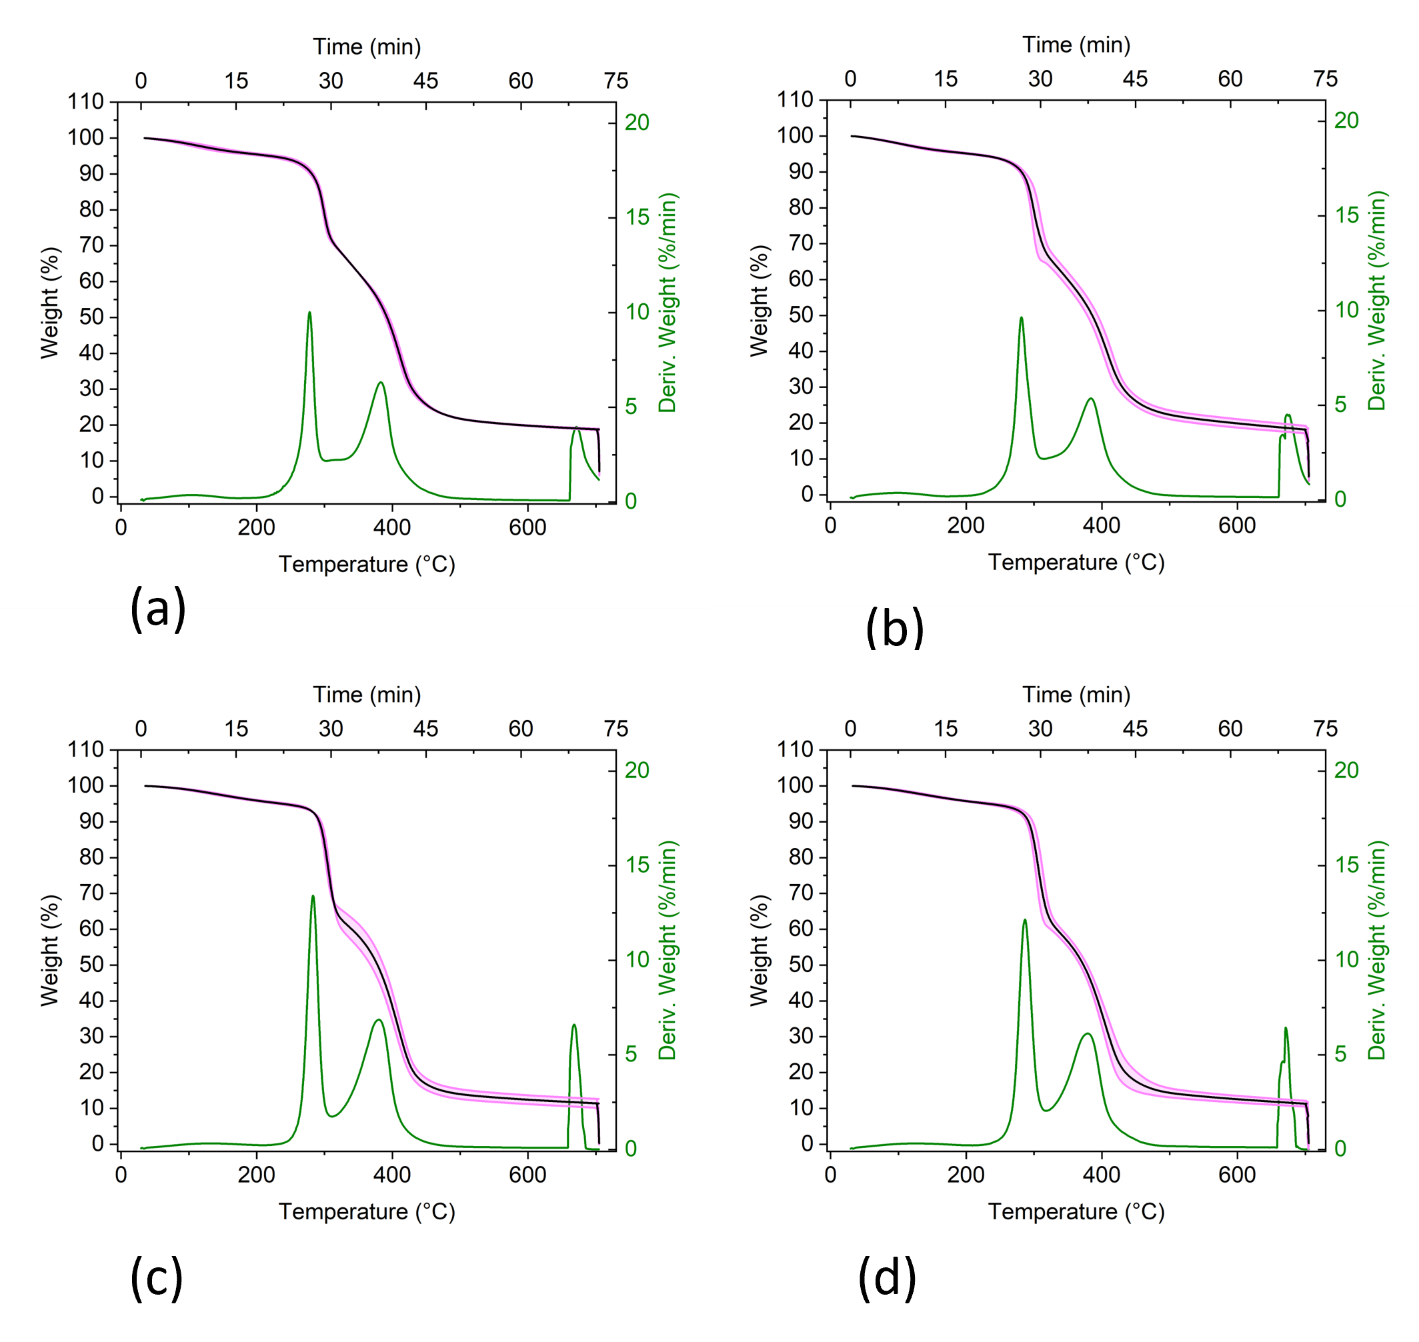


**Figure S3.** Thermogravimetric analysis of *T. asperellum* T36 NCAIM F 001434 (a, c) and *T. harzianum*, Td50b, NCAIM F001412 (b, d) grown in PDB (a, b) and cornmeal medium (c, d). The weight (%) is shown with the error bar limits (light magenta).
